# Supplementary material
Source: PubMed Central journal article supplement (PMC4564323)
Supplement: NIHMS718610-supplement-Supplemental.pdf [file NIHMS718610-supplement-Supplemental.pdf]

## SUPPORTING INFORMATION

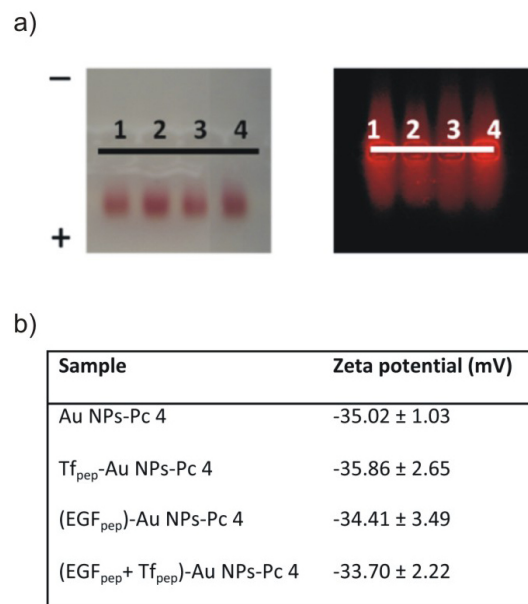

**Figure S1. Gel Electrophoresis and Zeta Potential**

a) 1% agarose gel at 120 V for 4 h in TAE (tris acetate EDTA) buffer. From left to right: 1) AuNPs-Pc 4, 2) EGF<sub>pep</sub>-AuNPs-Pc 4, 3) Tf<sub>pep</sub>-AuNPs-Pc 4, 4) (EGF<sub>pep</sub>+Tf<sub>pep</sub>)-AuNPs-Pc 4; b) Zeta potentials were measured using a ZetaPals particle analyzer (Brookhaven Instruments, NY)

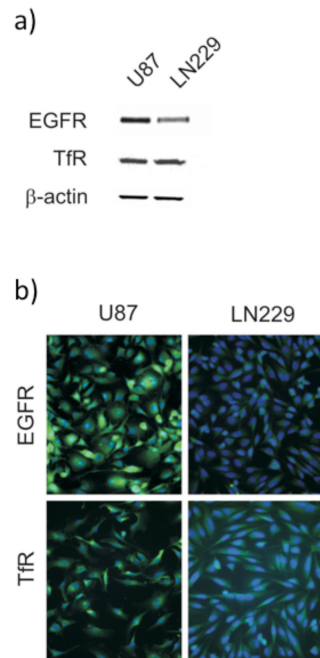

**Figure S2. EGFR and TfR overexpression in glioma cells**

a) Western blot of EGFR and TfR overexpression in glioma cell lines, U87 and LN229, b) U87 and LN229 cells were immunostained with either anti-EGFR or anti-TfR. Epi-fluorescence images show nuclei (blue, DAPI) and receptors (green, EGFR, 488 nm, orange, TfR, 594 nm). Images acquired at 40X magnification.

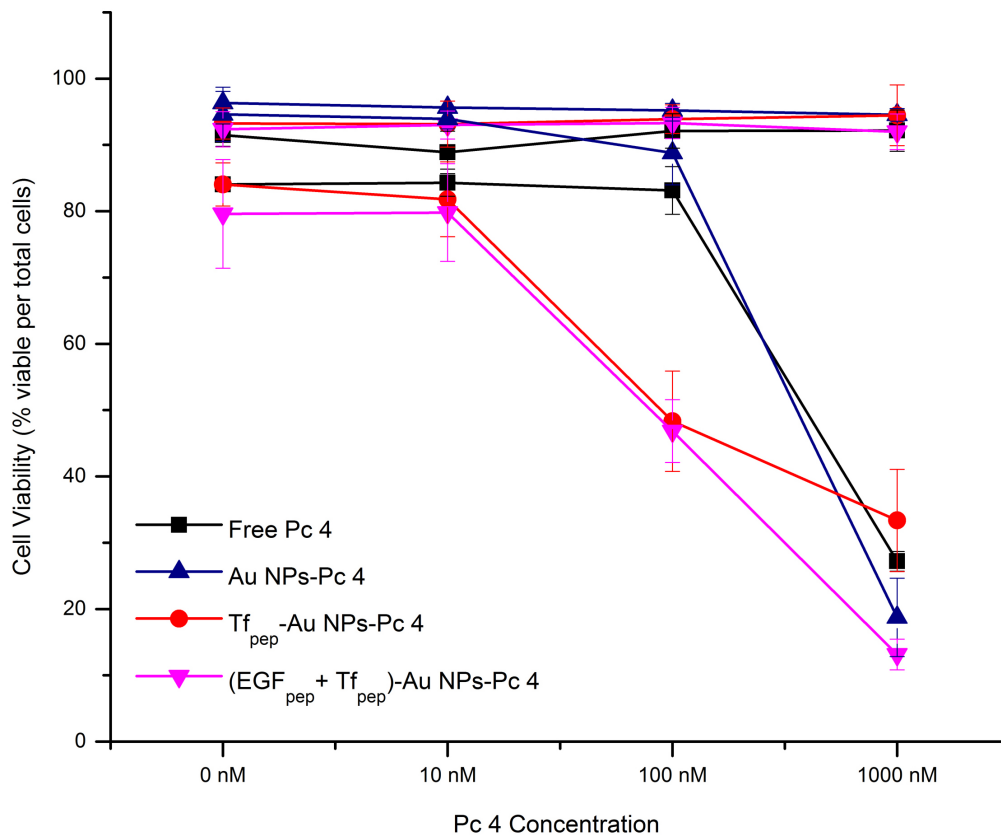

**Figure S3. Activation of Pc 4 delivered via untargeted, single targeted or dual targeted AuNPs in glioma cells**

U87 cells were treated with increasing concentrations targeted AuNPs-Pc 4 versus standard of care free Pc 4 or untargeted AuNPs for 4 hours and either unactivated (dark) or activated (light) by light ( $670 \text{ nm}$ ,  $0.83 \text{ J cm}^{-2} \text{ s}^{-1}$ ). Cell viability was measured using flow cytometry.

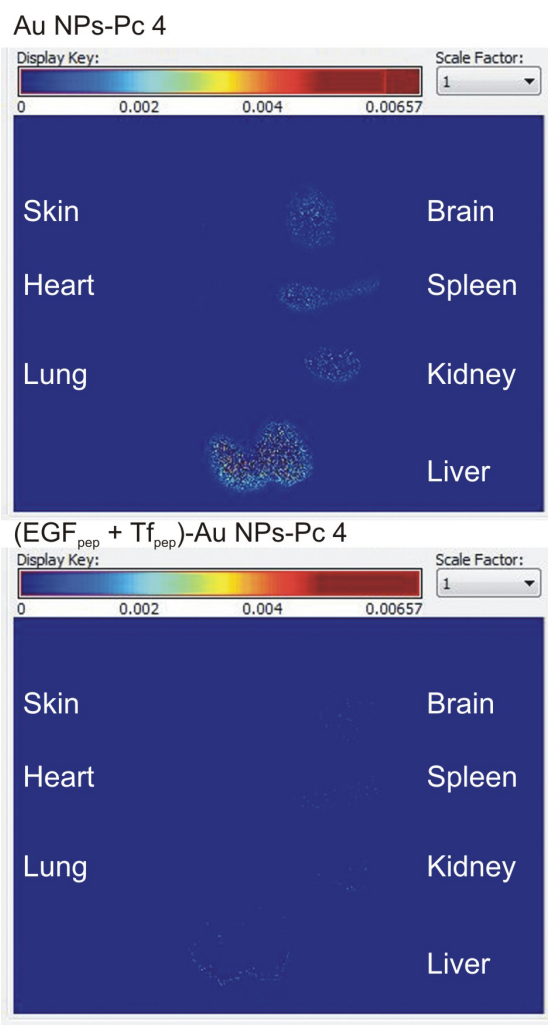

**Figure S4. Biodistribution of Pc 4 after intravenous injection of untargeted and targeted AuNPs**

Mice injected intravenously with either AuNPs-Pc 4 or (EGF<sub>pep</sub>+Tf<sub>pep</sub>)-AuNPs-Pc 4 were examined for Pc 4 fluorescence after 24 hours of circulation. The organs were excised from the animals and fluorescence acquired using in vivo fluorescence imaging.
